# Supplementary material for: Cytokine Signatures in Psoriatic Arthritis Patients Indicate Different Phenotypic Traits Comparing Responders and Non-Responders of IL-17A and TNFα Inhibitors
Source: MDPI journal article supplement (doi:10.3390/ijms24076343), 2023-03-28
Supplement: s1 [file s1]

**Table S1:** Biomarker level at baseline grouped by DAPSA50 responders and non-responders to treatment

|                | <b>TNFi responders<br/>(n=11)</b>                                  | <b>TNFi non-responders<br/>(n=9)</b>                               | <b>p-value</b> | <b>IL-17i responders<br/>(n=7)</b>                                 | <b>IL-17i non-responders<br/>(n=12)</b>                            | <b>p-value</b> |
|----------------|--------------------------------------------------------------------|--------------------------------------------------------------------|----------------|--------------------------------------------------------------------|--------------------------------------------------------------------|----------------|
| bFGF           | 311.94 (172.22-548.19)                                             | 331.07 (122.07-535.24)                                             | 0.824          | 420.41 (189.39-1363.28)                                            | 26.95 (128.25-415.00)                                              | 0.340          |
| Flt-1/VEGFR1   | 1862.10 (1494.40-2206.90)                                          | 2271.0 (1725.0-2532.0)                                             | 0.295          | 1684.0 (1530.0-1807.0)                                             | 2101.0 (1765.0-2688.0)                                             | 0.100          |
| PlGF           | 99.76 (85.84-104.65)                                               | 102.05 (90.84-110.34)                                              | 0.603          | 108.27 (105.26-120.62)                                             | 88.58 (52.88-122.68)                                               | 0.536          |
| Tie-2          | 1.21x10 <sup>5</sup> (9.74x10 <sup>4</sup> -1.34x10 <sup>5</sup> ) | 1.28x10 <sup>5</sup> (9.10x10 <sup>4</sup> -1.31x10 <sup>5</sup> ) | 0.882          | 1.12x10 <sup>5</sup> (7.81x10 <sup>4</sup> -1.22x10 <sup>5</sup> ) | 1.18x10 <sup>5</sup> (8.19x10 <sup>4</sup> -1.45x10 <sup>5</sup> ) | 0.536          |
| VEGF-A         | 1837.0 (1698.0-2628.0)                                             | 2596.0 (1401.0-4016.0)                                             | 0.662          | 5679.0 (2368.0-6860.0)                                             | 2038.0 (1601.0-2945.0)                                             | <b>0.005</b>   |
| VEGF-C         | 1773.0 (1066.7-2113.1)                                             | 1936.0 (1545.8-2495.2)                                             | 0.503          | 3315.3 (2253.5-4489.8)                                             | 1250.5 (912.8-1637.5)                                              | <b>0.022</b>   |
| VEGF-D         | 2.25x10 <sup>4</sup> (1.94x10 <sup>4</sup> -2.82x10 <sup>4</sup> ) | 2.00x10 <sup>4</sup> (1.61x10 <sup>4</sup> -2.56x10 <sup>4</sup> ) | 0.503          | 2.66x10 <sup>4</sup> (1.93x10 <sup>4</sup> -3.11x10 <sup>4</sup> ) | 2.12x10 <sup>4</sup> (1.51x10 <sup>4</sup> -2.54x10 <sup>4</sup> ) | 0.340          |
| Eotaxin        | 217.4 (147.3-378.4)                                                | 246.1 (231.4-418.0)                                                | 0.331          | 424.7 (314.3-545.1)                                                | 292.5 (214.8-427.3)                                                | 0.299          |
| IP-10/CXCL10   | 576.40 (353.90-626.6.0)                                            | 428.4 (337.30-459.0)                                               | 0.412          | 655.3 (548.1-1014.6)                                               | 407.9 (314.8-602.5)                                                | 0.083          |
| MCP-1/CCL2     | 122.18 (86.68-202.02)                                              | 126.01 (85.48-158.76)                                              | 0.824          | 257.60 (162.22-282.64)                                             | 122.20 (95.44-233.18)                                              | 0.261          |
| MCP-4/CCL13    | 71.34 (51.79-130.59)                                               | 83.98 (70.58-170.03)                                               | 0.603          | 107.26 (74.19-141.13)                                              | 73.31 (63.72-100.79)                                               | 0.227          |
| MDC/CCL22      | 1473.20 (761.0-1921.30)                                            | 1150.0 (1023.50-1756.1)                                            | 0.941          | 2039.6 (1828.5-2726.9)                                             | 1294.2 (1033.0-1784.2)                                             | 0.083          |
| MIP-1β/CCL4    | 88.74 (65.38-104.59)                                               | 67.50 (45.47-107.35)                                               | 0.370          | 149.48 (128.15-216.46)                                             | 72.72 (61.28-98.67)                                                | <b>0.002</b>   |
| TARC/CCL17     | 140.85 (76.27-268-73)                                              | 143.84 (112.85-220.44)                                             | 1.000          | 310.0 (259.0-424.0)                                                | 122.01 (97.79-201.13)                                              | <b>0.010</b>   |
| IL-12/IL-23p40 | 99.76 (65.93-124.43)                                               | 80.10 (62.18-102.82)                                               | 0.710          | 199.47 (120.10-278.13)                                             | 111.60 (84.08-169.19)                                              | 0.227          |
| IL-15          | 2.28 (1.95-2.53)                                                   | 2.71 (2.16-3.02)                                                   | 0.331          | 2.23 (2.02-2.83)                                                   | 2.54 (2.180-2.87)                                                  | 0.837          |
| IL-16          | 279.1 (224.7-308.2)                                                | 247.00 (200.50-283.20)                                             | 0.503          | 289.7 (243.6-239.6)                                                | 231.73 (167.35-329.24)                                             | 0.299          |
| IL-1 α         | 2.94 (1.76-4.79)                                                   | 4.85 (2.80-5.96)                                                   | 0.323          | 4.86 (1.85-8.17)                                                   | 3.16 (2.18-5.08)                                                   | 0.352          |
| IL-7           | 3.84 (2.74-6.54)                                                   | 4.71 (3.17-8.22)                                                   | 0.656          | 4.85 (2.93-8.05)                                                   | 2.77 (1.60-4.90)                                                   | <b>0.017</b>   |
| IL-17A         | 4.64 (2.71-9.29)                                                   | 4.85 (2.80-5.96)                                                   | 0.094          | 11.23 (4.29-11.68)                                                 | 4.74 (3.52-9.29)                                                   | 0.966          |
| IL-1RA         | 424.0 (22.3-520.6)                                                 | 429.06 (396.72-566.72)                                             | 0.710          | 451.3 (427.7-1127.2)                                               | 550.9 (188.5-903.6)                                                | 0.482          |
| IFNγ           | 4.73 (3.98-7.11)                                                   | 5.65 (3.43-9.31)                                                   | 0.941          | 4.58 (3.87-7.18)                                                   | 6.75 (3.13-12.35)                                                  | 0.536          |
| IL-10          | 0.24 (0.17-0.42)                                                   | 0.15 (0.14-0.23)                                                   | 0.175          | 0.32 (0.22-0.39)                                                   | 0.16 (0.14-0.22)                                                   | <b>0.045</b>   |
| IL-6           | 2.28 (1.21-3.21)                                                   | 1.12 (0.90-1.77)                                                   | 0.230          | 1.67 (1.28-6.51)                                                   | 1.28 (1.14-1.50)                                                   | 0.120          |
| IL-8           | 4.61 (4.09-5.18)                                                   | 4.88 (4.58-5.77)                                                   | 0.503          | 8.39-5.93-11.69)                                                   | 4.34 (3.37-5.30)                                                   | <b>0.004</b>   |
| TNFα           | 1.74 (1.33-2.00)                                                   | 1.26 (2.217-4.22)                                                  | 0.456          | 2.45 (1.83-36.25)                                                  | 1.93 (1.43-2.36)                                                   | 0.167          |
| IL-22          | 1.31 (0.86-1.79)                                                   | 1.70 (1.10-4.20)                                                   | 0.331          | 1.323 (100-1.92)                                                   | 1.95 (0.68-2.60)                                                   | 0.711          |
| IL-27          | 1002.90 (865.20-1745.80)                                           | 770.00 (542.00-1533.00)                                            | 0.370          | 1425.5 (1278.2-1591.1)                                             | 1140.4 (950.4-1359.2)                                              | 0.196          |
| MIP-3α/CCL20   | 6.34 (5.26-10.73)                                                  | 8.79 (5.76-12.23)                                                  | 0.824          | 14.62 (12.28-22.41)                                                | 8.71 (5.68-10.98)                                                  | <b>0.036</b>   |
| CRP            | 1.54x10 <sup>7</sup> (6.97x10 <sup>8</sup> -2.75x10 <sup>8</sup> ) | 1.52x10 <sup>7</sup> (1.34x10 <sup>7</sup> -2.75x10 <sup>8</sup> ) | 0.037          | 2.13x10 <sup>8</sup> (1.95x10 <sup>7</sup> -5.83x10 <sup>8</sup> ) | 1.33x10 <sup>8</sup> (5.19x10 <sup>7</sup> -1.76x10 <sup>8</sup> ) | <b>0.009</b>   |
| ICAM-1         | 7.86x10 <sup>6</sup> (6.80x10 <sup>6</sup> -8.25x10 <sup>6</sup> ) | 7.29x10 <sup>6</sup> (6.23x10 <sup>6</sup> -7.87x10 <sup>6</sup> ) | 0.447          | 8.72x10 <sup>6</sup> (7.84x10 <sup>6</sup> -1.05x10 <sup>7</sup> ) | 8.25x10 <sup>6</sup> (7.03x10 <sup>6</sup> -9.58x10 <sup>6</sup> ) | 0.592          |
| VCAM-1         | 7.03x10 <sup>6</sup> (6.60x10 <sup>6</sup> -9.68x10 <sup>6</sup> ) | 7.87x10 <sup>6</sup> (6.37x10 <sup>6</sup> -8.92x10 <sup>6</sup> ) | 1.000          | 8.95x10 <sup>6</sup> (7.67x10 <sup>6</sup> -9.88x10 <sup>6</sup> ) | 8.14x10 <sup>6</sup> (7.39x10 <sup>6</sup> -9.37x10 <sup>6</sup> ) | 0.592          |

Biomarker levels at baseline were presented with medians and corresponding interquartile ranges. Response to treatment was defined by DAPSA50 (yes/no) corresponding to a 50% improvement in DAPSA from baseline to follow-up. DAPSA; Disease Activity in Psoriatic Arthritis, TNFi; Tumour Necrosis Factor-alpha inhibitor, IL-17i; Interleukin 17 inhibitor, bFGF; basic Fibroblast

Growth Factor, Flt-1; Fms related Receptor Tyrosine Kinase-1, VEGFR1; Vascular Endothelial Growth Factor Receptor 1, PlGF; Placental Growth Factor, Tie-2; endothelial receptor tyrosine kinase, VEGF; Vascular Endothelial Growth Factor, IP-10; IFN-induced protein-10, CXCL; CXC chemokine ligand, MCP; monocyte chemoattractant protein, CCL; CC chemokine ligand, MDC; macrophage-derived chemokine, MIP; macrophage inflammatory protein, TARC; Thymus and activation regulated chemokine, IL; interleukin, IL-1RA; interleukin 1 receptor antagonist, IFN; interferon, TNF; Tumour Necrosis Factor, CRP; C-reactive protein, ICAM; Intercellular Adhesion Molecule, VCAM; Vascular Cell Adhesion Molecule.
