# Supplementary material for: Cytokine Signatures in Psoriatic Arthritis Patients Indicate Different Phenotypic Traits Comparing Responders and Non-Responders of IL-17A and TNFα Inhibitors
Source: MDPI journal article supplement (doi:10.3390/ijms24076343), 2023-03-28
Supplement: s1 [file s1]

**Table S3:** Biomarkers evaluated with the Meso Scale Diagnostics (MSD) V-PLEX Human Biomarker 54-Plex

| <b>Kit</b>            | <b>Biomarker</b>                                                                                                          |
|-----------------------|---------------------------------------------------------------------------------------------------------------------------|
| Angiogenesis Panel    | VEGF-A <sup>†</sup> , VEGF-C, VEGF-D, Tie-2, sFlt-1, PlGF, bFGF                                                           |
| Cytokine Panel 1      | GM-CSF, IL-1 $\alpha$ , IL-5, IL-7, IL-12/IL-23p40, IL-15, IL-16, IL-17A <sup>†</sup> , TNF $\beta$ , VEGF-A <sup>†</sup> |
| Cytokine Panel 2      | IL-17A/F, IL-17B, IL-17C, IL-17D, IL-1RA, IL-3, TSLP, IL-9                                                                |
| Chemokine Panel       | Eotaxin, MIP-1 $\beta$ , Eotaxin-3, IL-8 <sup>†</sup> , TARC, IP-10, MIP-1 $\alpha$ , MCP-1, MDC, MCP-4                   |
| Th17 Panel            | IL-21, IL-22, IL-23, IL-27, IL-31, IL-17A <sup>†</sup> , MIP-3 $\alpha$                                                   |
| Proinflammatory Panel | IFN $\gamma$ , IL-1 $\beta$ , IL-2, IL-4, IL-6, IL-8 <sup>†</sup> , IL-10, IL-12p70, IL-13, TNF $\alpha$                  |
| Vascular Injury Panel | SAA, CRP, VCAM-1, ICAM-1                                                                                                  |

<sup>†</sup> Biomarker presence in two panels. IFN; interferon, IL; interleukin, TNF; Tumor Necrosis Factor, CCL; Chemokine (C-C motif) Ligand (chemokine subgroup 'CC'), CXCL; chemokine (C-X-C motif) Ligand, MIP; Macrophage Inflammatory Protein, TARC; Thymus- and Activation-Regulated Chemokine, IP; Interferon-gamma-induced-Protein, MCP; Monocyte Chemoattractant Protein, GM-CSF; Granulocyte Macrophage Colony Stimulating Factor, VEGF; Vascular Endothelial Growth Factor, TSLP; Thymic Stromal Lymphopoietin, Tie; Tyrosine kinase, sFlt; soluble Fms-Like Tyrosine kinase, PlGF; Placental Growth Factor, bFGF; basic Fibroblast Growth Factor, SAA; Serum Amyloid A, CRP; C-Reactive Protein, VCAM; Vascular Cell Adhesion Molecule, ICAM; Intercellular Adhesion Molecule.
