# Supplementary material for: Cytokine Signatures in Psoriatic Arthritis Patients Indicate Different Phenotypic Traits Comparing Responders and Non-Responders of IL-17A and TNFα Inhibitors
Source: MDPI journal article supplement (doi:10.3390/ijms24076343), 2023-03-28
Supplement: s1 [file s1]

**Table S2:** Principal component analysis loadings of MTX initiators

| Biomarker      | MTX initiators |               |
|----------------|----------------|---------------|
|                | C1             | C2            |
| bFGF           | <b>0.865</b>   | -0.063        |
| Flt-1          | 0.040          | 0.265         |
| PlGF           | <b>0.541</b>   | -0.200        |
| Tie-2          | <b>0.661</b>   | -0.327        |
| VEGF-A         | <b>0.915</b>   | -0.270        |
| VEGF-C         | 0.457          | -0.260        |
| VEGF-D         | <b>0.641</b>   | <b>-0.510</b> |
| Eotaxin        | 0.150          | 0.324         |
| IP-10          | -0.258         | <b>0.684</b>  |
| MCP-1          | -0.065         | <b>0.508</b>  |
| MCP-4          | <b>0.755</b>   | -0.043        |
| MDC            | <b>0.541</b>   | <b>0.629</b>  |
| MIP-1 $\beta$  | 0.374          | <b>0.763</b>  |
| TARC           | <b>0.793</b>   | -0.039        |
| IL12/IL23p40   | 0.122          | <b>0.528</b>  |
| IL-15          | 0.084          | -0.192        |
| IL-16          | <b>0.560</b>   | 0.171         |
| IL-1 $\alpha$  | -0.095         | -0.190        |
| IL-7           | <b>0.975</b>   | -0.113        |
| IL-17A         | -0.031         | 0.085         |
| IL-1RA         | <b>0.631</b>   | <b>0.597</b>  |
| IFN $\gamma$   | -0.002         | 0.312         |
| IL-10          | -0.374         | -0.408        |
| IL-6           | -0.249         | -0.398        |
| IL-8           | <b>0.928</b>   | -0.210        |
| TNF $\alpha$   | <b>0.849</b>   | 0.224         |
| IL-22          | 0.087          | <b>0.604</b>  |
| IL-27          | -0.097         | <b>0.781</b>  |
| MIP-3 $\alpha$ | -0.135         | <b>0.694</b>  |
| CRP            | <b>0.946</b>   | -0.179        |
| ICAM-1         | 0.433          | 0.626         |
| VCAM-1         | 0.038          | 0.223         |

Loadings or correlation coefficients for component 1 and component 2 of the principal component analysis in PsA patients initiating treatment with MTX. Grey markings represent biomarkers with >5% contribution to the component. Bold text represents significant loading factors >0.500. bFGF; basic Fibroblast Growth Factor, Flt-1; Fms related Receptor Tyrosine Kinase-1, VEGFR1; Vascular Endothelial Growth Factor Receptor 1, PlGF; Placental Growth Factor, Tie-2; endothelial receptor tyrosine kinase, VEGF; Vascular Endothelial Growth Factor, IP-10; IFN-induced protein-10, CXCL; CXC chemokine ligand, MCP; monocyte chemoattractant protein, CCL; CC chemokine ligand, MDC; macrophage-derived chemokine, MIP; macrophage inflammatory protein, TARC; Thymus and activation regulated chemokine, IL; interleukin, IL-1RA; interleukin 1 receptor antagonist, IFN; interferon, TNF; Tumour Necrosis Factor, CRP; C-reactive protein, ICAM; Intercellular Adhesion Molecule, VCAM; Vascular Cell Adhesion Molecule.
